# Supplementary material
Source: publisher figshare collection journal article supplement (https://karger.figshare.com/ndownloader/files/9347491)
Supplement: Supplementary file 1 [file 9347491]

Supplementary material

Methods

*Serious life events analysis*

Questions regarding adverse life events during pregnancy and during the child´s first two months of life were found in the two-month questionnaire. The question "Did you experience anything that you would consider to be a severe life event during pregnancy or after the child´s birth" was followed by eight options with tick boxes for "During pregnancy" and "After pregnancy". Choices were available for: "Death of close relative"; "Severe disease in the family"; "Serious accident in family"; "Own divorce or separation"; "Been subjected to violence"; "Lost employment"; "Husband/Partner lost employment"; "Serious conflict with the child´s father or other significant person".
